# Supplementary material
Source: publisher figshare collection journal article supplement (https://sage.figshare.com/ndownloader/files/36578523)
Supplement: Supplementary file 1 [file 36578523]

**Supplementary** **Figure.** Frailty determinants in elderly patients with acute coronary syndrome according to the Tilburg Frailty Indicator (n = 57).
